# Supplementary material for: Patterns of association of native and exotic boring polychaetes on the southeastern Pacific coast of Chile: the combined importance of negative, positive and random interactions
Source: PeerJ. 2020 Apr 24;8:e8560. doi: 10.7717/peerj.8560 (PMC7203672; doi:10.7717/peerj.8560)
Supplement: Supplemental Information 1 [file peerj-08-8560-s001.xlsx]

## Sheet: DataBase
		Host measurements					# of native polychaetes		# of exotic polychates					(n / area) *1000
Zone	Locality	Length (mm)	Width (mm)	Shell area (mm2)	Host type	Host species	Dipolydora huelma	Dodecaceria sp.	Boccardia tricuspa	Polydora rickettsi	Total polychaetes (n)	Total Native (n)	Total Exotic (n)	Density of native polychaetes	Density of exotic polychaetes
North	Tongoy	70.5	46.6	2578.96	Exotic	Crassostrea gigas	0	0	0	31	31	0	31	0	12.0203
North	Tongoy	112.7	46.1	4078.44	Exotic	Crassostrea gigas	0	0	0	3	3	0	3	0	0.735575
North	Tongoy	113.2	51.5	4576.39	Exotic	Crassostrea gigas	0	0	2	0	2	2	2	0.437025	0.437025
North	Tongoy	90.5	39.8	2827.49	Exotic	Crassostrea gigas	0	0	0	21	21	0	21	0	7.42708
North	Tongoy	104.4	34.4	2819.22	Exotic	Crassostrea gigas	0	0	4	39	43	4	43	1.41883	15.2525
North	Tongoy	103.3	44.4	3600.42	Exotic	Crassostrea gigas	0	0	0	37	37	0	37	0	10.2766
North	Tongoy	68.3	45.4	2434.14	Exotic	Crassostrea gigas	0	0	0	5	5	0	5	0	2.05411
North	Tongoy	86.9	47.6	3247.11	Exotic	Crassostrea gigas	0	0	0	51	51	0	51	0	15.7063
North	Tongoy	90.5	40.4	2870.12	Exotic	Crassostrea gigas	0	0	0	16	16	0	16	0	5.57469
North	Tongoy	76.6	49.8	2994.52	Exotic	Crassostrea gigas	0	0	0	16	16	0	16	0	5.34309
North	Tongoy	90.5	45.6	3239.54	Exotic	Crassostrea gigas	0	0	0	1	1	0	1	0	0.308686
North	Tongoy	100.5	46.6	3676.39	Exotic	Crassostrea gigas	0	0	0	1	1	0	1	0	0.272006
North	Tongoy	90.6	54.7	3890.32	Exotic	Crassostrea gigas	0	0	0	2	2	0	2	0	0.514097
North	Caldera	63.7	44.4	2220.2	Exotic	Haliotis rufescens	0	0	0	1	1	0	1	0	0.45041
North	Caldera	132.2	115.4	11975.9	Exotic	Haliotis rufescens	0	0	0	63	63	0	63	0	5.26058
North	Caldera	134.4	110.5	11658.2	Exotic	Haliotis rufescens	0	0	0	35	35	0	35	0	3.00218
North	Caldera	55.9	37.3	1636.78	Exotic	Haliotis rufescens	0	0	0	3	3	0	3	0	1.83287
North	Caldera	57.3	39.8	1790.22	Exotic	Haliotis rufescens	0	0	0	9	9	0	9	0	5.0273
North	Caldera	129.3	102.7	10424.1	Exotic	Haliotis rufescens	0	0	0	29	29	0	29	0	2.78201
North	Caldera	135.1	112.7	11952.2	Exotic	Haliotis rufescens	0	0	0	20	20	0	20	0	1.67333
North	Caldera	146.1	114.4	13120.4	Exotic	Haliotis rufescens	0	0	0	19	19	0	19	0	1.44813
North	Tongoy	88.3	93.3	6467.14	Native	Argopecten purpuratus	1	0	0	0	1	1	0	0.154628	0
North	Tongoy	78.3	130.5	8021.25	Native	Argopecten purpuratus	0	0	0	27	27	0	27	0	3.36606
North	Tongoy	106.1	107.7	8970.17	Native	Argopecten purpuratus	0	0	0	2	2	0	2	0	0.222961
North	Tongoy	102.7	121.6	9803.33	Native	Argopecten purpuratus	0	0	0	12	12	0	12	0	1.22407
North	Tongoy	83.3	90.5	5917.84	Native	Argopecten purpuratus	1	0	0	2	3	1	2	0.168981	0.337961
North	Tongoy	77.3	85.1	5163.91	Native	Argopecten purpuratus	0	0	0	16	16	0	16	0	3.09843
North	Tongoy	65.1	68.6	3505.7	Native	Argopecten purpuratus	0	0	0	1	1	0	1	0	0.28525
North	Tongoy	69.8	72.7	3983.45	Native	Argopecten purpuratus	0	0	0	9	9	0	9	0	2.25935
North	Tongoy	76.6	78.3	4708.26	Native	Argopecten purpuratus	0	0	0	3	3	0	3	0	0.637178
North	Tongoy	76.4	83.3	4995.83	Native	Argopecten purpuratus	0	0	0	2	2	0	2	0	0.400334
North	Tongoy	85.1	96.6	6453.22	Native	Argopecten purpuratus	0	0	0	1	1	0	1	0	0.154961
North	Tongoy	31.6	27.3	677.204	Native	Austromegabalanus psittacus	0	0	0	22	22	0	22	0	32.4865
North	Tongoy	33.8	27.2	721.698	Native	Austromegabalanus psittacus	0	0	0	8	8	0	8	0	11.085
North	Tongoy	42.7	38.3	1283.8	Native	Austromegabalanus psittacus	0	0	0	28	28	0	28	0	21.8103
North	Tongoy	41.6	35.1	1146.23	Native	Austromegabalanus psittacus	0	0	0	11	11	0	11	0	9.59671
North	Tongoy	39.4	23.7	733.017	Native	Austromegabalanus psittacus	0	0	0	12	12	0	12	0	16.3707
North	Tongoy	37.3	32.7	957.472	Native	Austromegabalanus psittacus	0	0	0	24	24	0	24	0	25.066
North	Tongoy	60.5	26.1	1239.55	Native	Austromegabalanus psittacus	0	0	0	23	23	0	23	0	18.5551
North	Tongoy	61.6	31.1	1503.87	Native	Austromegabalanus psittacus	0	0	0	2	2	0	2	0	1.3299
North	Tongoy	50.9	42.2	1686.16	Native	Austromegabalanus psittacus	1	0	0	1	2	1	1	0.593062	0.593062
North	Tongoy	44.4	37.3	1300.05	Native	Austromegabalanus psittacus	0	0	0	1	1	0	1	0	0.769199
North	Tongoy	34.9	25.1	687.652	Native	Austromegabalanus psittacus	0	0	0	1	1	0	1	0	1.45422
North	Tongoy	36.6	28.3	813.087	Native	Austromegabalanus psittacus	0	0	0	2	2	0	2	0	2.45976
North	Bahia Panul	50.5	47.7	1890.95	Native	Calyptraea sp	0	0	0	1	1	0	1	0	0.528835
North	Bahia Panul	50.5	47.7	1890.95	Native	Calyptraea sp	0	0	0	3	3	0	3	0	1.58651
North	Bahia Panul	30.5	29.9	715.881	Native	Calyptraea sp	0	0	0	3	3	0	3	0	4.19064
North	Caldera	30.4	28.8	687.283	Native	Calyptraea sp	0	0	0	11	11	0	11	0	16.005
North	Caldera	31.3	34.3	842.768	Native	Calyptraea sp	0	0	4	0	4	4	4	4.74626	4.74626
North	Caldera	32.2	22.7	573.788	Native	Calyptraea sp	0	0	0	9	9	0	9	0	15.6852
North	Caldera	27.6	26.6	576.316	Native	Calyptraea sp	0	0	0	1	1	0	1	0	1.73516
North	Caldera	47.2	39.4	1459.85	Native	Calyptraea sp	0	1	0	12	13	1	13	0.685002	8.90503
North	Caldera	45.9	33.3	1199.85	Native	Calyptraea sp	0	2	0	24	26	2	26	1.66688	21.6694
North	Caldera	39.4	35.9	1110.35	Native	Calyptraea sp	0	0	0	15	15	0	15	0	13.5092
North	Caldera	42.2	39.8	1318.45	Native	Calyptraea sp	0	0	6	34	40	6	40	4.55078	30.3385
North	Caldera	44.4	40.5	1411.59	Native	Calyptraea sp	0	0	0	2	2	0	2	0	1.41685
North	Caldera	46.6	46.6	1704.67	Native	Calyptraea sp	0	0	0	2	2	0	2	0	1.17324
North	Caldera	35.4	31.5	875.353	Native	Calyptraea sp	0	0	0	15	15	0	15	0	17.1359
North	Caldera	33.7	34.4	910.035	Native	Calyptraea sp	0	0	0	2	2	0	2	0	2.19772
North	Caldera	34.4	34.3	926.237	Native	Calyptraea sp	0	0	0	18	18	0	18	0	19.4335
North	Caldera	35.4	35.1	975.394	Native	Calyptraea sp	0	0	0	23	23	0	23	0	23.5802
North	Caldera	40.5	39.3	1249.45	Native	Calyptraea sp	0	1	0	7	8	1	8	0.800355	6.40284
North	Caldera	39.3	40.8	1258.7	Native	Calyptraea sp	0	0	0	8	8	0	8	0	6.35576
North	Caldera	41.2	39.8	1287.21	Native	Calyptraea sp	0	1	0	6	7	1	7	0.776873	5.43811
North	Caldera	42.5	43.3	1444.6	Native	Calyptraea sp	0	0	0	1	1	0	1	0	0.692235
North	Caldera	47.6	42.5	1588.06	Native	Calyptraea sp	0	1	0	1	2	1	2	0.629701	1.2594
North	Caldera	50.5	47.3	1875.09	Native	Calyptraea sp	0	1	0	1	2	1	2	0.533308	1.06662
North	Caldera	49.3	49.8	1927.28	Native	Calyptraea sp	0	1	0	2	3	1	3	0.518865	1.55659
North	Caldera	52.7	50.5	2089.16	Native	Calyptraea sp	0	1	0	1	2	1	2	0.478661	0.957323
North	Caldera	52.7	51.2	2118.12	Native	Calyptraea sp	0	2	0	4	6	2	6	0.944234	2.8327
North	Tongoy	90.5	83.7	5946.26	Native	Calyptraea sp	3	0	0	0	3	3	0	0.504519	0
North	Tongoy	67.7	60.9	3236.5	Native	Calyptraea sp	0	0	16	0	16	16	16	4.94361	4.94361
North	Tongoy	71.6	68.8	3866.97	Native	Calyptraea sp	1	0	0	0	1	1	0	0.2586	0
North	Tongoy	52.2	46.6	1909.53	Native	Calyptraea sp	1	0	4	1	6	5	5	2.61845	2.61845
North	Tongoy	93.8	81.6	6008.45	Native	Calyptraea sp	2	0	0	0	2	2	0	0.332864	0
North	Tongoy	70.5	75.9	4200.5	Native	Calyptraea sp	0	0	0	2	2	0	2	0	0.476134
North	Tongoy	39.9	35.9	1124.44	Native	Calyptraea sp	0	0	0	1	1	0	1	0	0.88933
North	Tongoy	63.7	53.3	2665.24	Native	Calyptraea sp	4	0	2	0	6	6	2	2.2512	0.750402
North	Tongoy	67.7	65.1	3459.71	Native	Calyptraea sp	5	0	3	0	8	8	3	2.31233	0.867125
North	Bahia Panul	96.3	71.3	5389.96	Native	Concholepas concholepas	0	0	0	2	2	0	2	0	0.37106
North	Bahia Panul	96.3	71.3	5389.96	Native	Concholepas concholepas	0	0	0	2	2	0	2	0	0.37106
North	Bahia Panul	94.2	75.4	5575.6	Native	Concholepas concholepas	0	0	0	2	2	0	2	0	0.358706
North	Bahia Panul	85.9	72.2	4868.55	Native	Concholepas concholepas	0	0	0	3	3	0	3	0	0.616199
North	Bahia Panul	79.5	64.7	4037.77	Native	Concholepas concholepas	0	0	0	4	4	0	4	0	0.990647
North	Bahia Panul	103.3	79.4	6438.59	Native	Concholepas concholepas	0	0	0	1	1	0	1	0	0.155314
North	Bahia Panul	103.3	79.4	6438.59	Native	Concholepas concholepas	0	0	0	1	1	0	1	0	0.155314
North	Bahia Panul	40.5	31.5	1001.46	Native	Concholepas concholepas	0	0	0	5	5	0	5	0	4.99269
North	Bahia Panul	74.7	50.6	2967.16	Native	Concholepas concholepas	0	0	0	1	1	0	1	0	0.337023
North	Bahia Panul	65.4	37.6	1930.35	Native	Concholepas concholepas	0	1	0	16	17	1	17	0.518042	8.80671
North	Bahia Panul	112.7	69.8	6175.17	Native	Concholepas concholepas	0	1	0	0	1	1	1	0.161939	0.161939
North	Bahia Panul	77.6	59.9	3648.87	Native	Concholepas concholepas	0	0	0	4	4	0	4	0	1.09623
North	Bahia Panul	79.5	77.7	4849.06	Native	Concholepas concholepas	0	1	0	3	4	1	4	0.206225	0.824902
North	Bahia Panul	92.2	75.3	5449.99	Native	Concholepas concholepas	0	3	0	4	7	3	7	0.55046	1.28441
North	Bahia Panul	97.2	72.7	5547.16	Native	Concholepas concholepas	0	0	0	15	15	0	15	0	2.70409
North	Bahia Panul	101.2	75.5	5997.87	Native	Concholepas concholepas	0	0	0	8	8	0	8	0	1.33381
North	Caldera	27.6	19.8	428.987	Native	Concholepas concholepas	0	0	0	4	4	0	4	0	9.3243
North	Caldera	27.6	19.8	428.987	Native	Concholepas concholepas	0	0	0	2	2	0	2	0	4.66215
North	Caldera	41.5	36.9	1202.11	Native	Concholepas concholepas	0	0	1	2	3	1	3	0.831871	2.49561
North	Caldera	40.5	29.3	931.52	Native	Concholepas concholepas	0	0	0	2	2	0	2	0	2.14703
North	Caldera	14.4	35.4	400.162	Native	Concholepas concholepas	0	1	0	20	21	1	21	2.49899	52.4788
North	Caldera	44.4	33.7	1174.58	Native	Concholepas concholepas	0	2	0	5	7	2	7	1.70274	5.95958
North	Caldera	43.7	35.4	1214.38	Native	Concholepas concholepas	0	0	1	7	8	1	8	0.823466	6.58773
North	Caldera	67.6	27.3	1448.7	Native	Concholepas concholepas	0	0	0	6	6	0	6	0	4.14164
North	Caldera	50.5	50.8	2013.84	Native	Concholepas concholepas	0	1	0	3	4	1	4	0.496564	1.98626
North	Tongoy	81.4	87.4	5584.77	Native	Concholepas concholepas	0	9	0	15	24	9	24	1.61152	4.2974
North	Caldera	33.7	30.5	806.862	Native	Crepidula sp	0	0	0	1	1	0	1	0	1.23937
North	Caldera	34.3	31.5	848.153	Native	Crepidula sp	0	0	0	3	3	0	3	0	3.5371
North	Caldera	36.6	32.7	939.504	Native	Crepidula sp	0	0	0	5	5	0	5	0	5.32196
North	Caldera	49.8	31.5	1231.43	Native	Fissurella spp	0	0	0	12	12	0	12	0	9.74477
North	Caldera	56.6	37.3	1657.28	Native	Fissurella spp	0	0	0	17	17	0	17	0	10.2578
North	Caldera	39.4	19.6	606.208	Native	Fissurella spp	0	0	0	1	1	0	1	0	1.6496
North	Caldera	48.3	38.8	1471.12	Native	Fissurella spp	0	0	0	54	54	0	54	0	36.7067
North	Caldera	55.1	43.8	1894.5	Native	Fissurella spp	0	0	0	16	16	0	16	0	8.44549
North	Caldera	46.6	34.4	1258.39	Native	Fissurella spp	0	0	0	0	0	0	0	0	0
North	Caldera	53.7	33.7	1420.61	Native	Fissurella spp	0	0	0	19	19	0	19	0	13.3746
North	Caldera	91.2	61.2	4381.43	Native	Fissurella spp	0	3	0	32	35	3	35	0.684708	7.98826
North	Caldera	75.9	55.5	3306.77	Native	Fissurella spp	0	0	0	3	3	0	3	0	0.907229
North	Tongoy	42.2	18.3	606.224	Native	Mytilus chilensis	0	0	0	1	1	0	1	0	1.64956
North	Tongoy	56.6	29.3	1301.83	Native	Odontocymbiola sp	4	0	0	6	10	4	6	3.0726	4.6089
North	Tongoy	48.3	27.6	1046.47	Native	Odontocymbiola sp	6	0	0	0	6	6	0	5.73357	0
North	Tongoy	50.4	26.3	1040.53	Native	Odontocymbiola sp	0	0	0	1	1	0	1	0	0.961046
North	Tongoy	54.4	28.8	1229.88	Native	Odontocymbiola sp	0	0	0	1	1	0	1	0	0.813091
North	Tongoy	56.6	29.3	1301.83	Native	Odontocymbiola sp	0	0	0	1	1	0	1	0	0.76815
North	Caldera	31.6	14.3	354.726	Native	Perumytilus purpuratus	0	0	0	1	1	0	1	0	2.81908
North	Caldera	65.4	70.5	3619.4	Native	Perumytilus purpuratus	0	0	0	1	1	0	1	0	0.276289
North	Bahia Panul	24.9	6.6	129.007	Native	Scurria sp.	0	0	1	0	1	1	1	7.75152	7.75152
North	Bahia Panul	25.5	9.9	198.173	Native	Scurria sp.	0	0	0	1	1	0	1	0	5.04609
North	Bahia Panul	25.5	11.6	232.203	Native	Scurria sp.	0	0	0	1	1	0	1	0	4.30658
North	Bahia Panul	51.6	43.3	1753.91	Native	Scurria viridula	0	0	0	1	1	0	1	0	0.570155
North	Bahia Panul	50.5	46.6	1847.34	Native	Tegula atra	0	0	0	2	2	0	2	0	1.08264
North	Caldera	40.5	37.6	1195.4	Native	Tegula atra	0	0	0	5	5	0	5	0	4.18271
North	Caldera	35.9	32.7	921.535	Native	Tegula atra	0	0	0	3	3	0	3	0	3.25544
North	Caldera	40.5	38.3	1217.65	Native	Tegula atra	0	0	0	4	4	0	4	0	3.28501
North	Caldera	22.2	20.5	357.253	Native	Tegula atra	0	0	0	1	1	0	1	0	2.79913
North	Caldera	31.4	21.7	534.883	Native	Tegula atra	0	0	0	1	1	0	1	0	1.86957
North	Caldera	31.6	28.3	702.01	Native	Tegula atra	0	0	0	1	1	0	1	0	1.42448
North	Caldera	36.1	34.8	986.18	Native	Tegula atra	0	0	0	2	2	0	2	0	2.02803
North	Caldera	42.2	38.8	1285.33	Native	Tegula atra	0	0	0	4	4	0	4	0	3.11205
North	Caldera	45.5	42.7	1525.14	Native	Tegula atra	0	0	0	1	1	0	1	0	0.655679
North	Tongoy	33.3	30.5	797.285	Native	Tegula atra	1	0	0	0	1	1	0	1.25426	0
North	Tongoy	36.6	33.8	971.108	Native	Tegula atra	0	0	3	24	27	3	27	3.08926	27.8033
North	Tongoy	35	31.6	868.21	Native	Tegula atra	0	0	0	1	1	0	1	0	1.1518
North	Tongoy	33.3	30.1	786.829	Native	Tegula atra	16	0	0	25	41	16	25	20.3348	31.7731
North	Tongoy	37.2	34.4	1004.55	Native	Tegula atra	7	0	0	3	10	7	3	6.9683	2.98642
North	Tongoy	36.2	33.7	957.653	Native	Tegula atra	0	0	0	19	19	0	19	0	19.8402
North	Tongoy	37.3	35.1	1027.75	Native	Tegula atra	0	0	0	32	32	0	32	0	31.1361
North	Tongoy	40.5	36.6	1163.61	Native	Tegula atra	0	0	4	12	16	4	16	3.43759	13.7504
North	Tongoy	35.9	32.6	918.717	Native	Tegula atra	1	0	0	1	2	1	1	1.08847	1.08847
North	Tongoy	34.8	30.5	833.199	Native	Tegula atra	0	0	0	27	27	0	27	0	32.4052
North	Tongoy	32.7	30.5	782.92	Native	Tegula atra	0	0	0	21	21	0	21	0	26.8227
North	Tongoy	35.9	33.7	949.717	Native	Tegula atra	0	0	0	3	3	0	3	0	3.15884
North	Tongoy	37.6	32.2	950.415	Native	Tegula atra	2	0	0	3	5	2	3	2.10434	3.15652
North	Tongoy	42	14.9	491.253	Native	Turitela sp	0	0	0	7	7	0	7	0	14.2493
North	Tongoy	51.5	14.5	586.199	Native	Turitela sp	2	0	1	0	3	3	1	5.11772	1.70591
North	Tongoy	40.5	11.2	356.076	Native	Turitela sp	2	0	0	0	2	2	0	5.61678	0
North	Tongoy	50.5	57.2	2267.55	Native	Venus antiqua	4	0	0	0	4	4	0	1.76402	0
North	Tongoy	52.3	58.3	2393.54	Native	Venus antiqua	0	0	0	27	27	0	27	0	11.2804
North	Tongoy	40.5	48.3	1535.58	Native	Venus antiqua	0	0	0	1	1	0	1	0	0.651221
North	Tongoy	71.4	52.3	2931.36	Native	Venus antiqua	0	0	0	3	3	0	3	0	1.02341
North	Tongoy	45.1	29.4	1040.86	Native	Xanthochorus cassidiforms	0	0	0	1	1	0	1	0	0.960741
North	Tongoy	58.2	36.6	1672.14	Native	Xanthochorus cassidiforms	1	0	0	1	2	1	1	0.598035	0.598035
North	Tongoy	53.8	33.8	1427.48	Native	Xanthochorus cassidiforms	0	0	0	1	1	0	1	0	0.700537
North	Tongoy	39.9	24.8	776.773	Native	Xanthochorus cassidiforms	0	0	0	3	3	0	3	0	3.86213
North	Tongoy	40.5	22.2	705.793	Native	Xanthochorus cassidiforms	0	0	0	1	1	0	1	0	1.41685
South	Queilen	82.05	59.4	3825.91	Exotic	Crassostrea gigas	0	2	9	0	11	11	11	2.87513	2.87513
South	Queilen	71.2	61.35	3428.97	Exotic	Crassostrea gigas	7	6	0	0	13	13	6	3.79122	1.74979
South	Queilen	101	55.95	4436	Exotic	Crassostrea gigas	24	3	0	0	27	27	3	6.08657	0.676286
South	Queilen	93.1	44	3215.67	Exotic	Crassostrea gigas	21	0	0	0	21	21	0	6.53051	0
South	Queilen	94.1	60	4432.11	Exotic	Crassostrea gigas	13	4	1	0	18	18	5	4.06127	1.12813
South	Queilen	92	60	4333.2	Exotic	Crassostrea gigas	31	0	0	0	31	31	0	7.15407	0
South	Queilen	107.9	65.3	5531.01	Exotic	Crassostrea gigas	0	3	0	0	3	3	3	0.542397	0.542397
South	Queilen	103.85	51.7	4214.7	Exotic	Crassostrea gigas	0	4	5	0	9	9	9	2.13538	2.13538
South	Queilen	105.4	64.7	5353.21	Exotic	Crassostrea gigas	1	1	0	0	2	2	1	0.373607	0.186804
South	Queilen	120.5	72.2	6829.58	Exotic	Crassostrea gigas	0	2	0	0	2	2	2	0.292844	0.292844
South	Queilen	126.1	75.4	7463.73	Exotic	Crassostrea gigas	3	0	0	0	3	3	0	0.401944	0
South	Queilen	100.5	60.5	4773	Exotic	Crassostrea gigas	1	5	0	0	6	6	5	1.25707	1.04756
South	Queilen	100.5	76.6	6043.17	Exotic	Crassostrea gigas	6	0	0	0	6	6	0	0.992857	0
South	Queilen	126.1	73.7	7295.45	Exotic	Crassostrea gigas	5	2	0	0	7	7	2	0.959502	0.274143
South	Queilen	100.5	60.5	4773	Exotic	Crassostrea gigas	0	1	0	0	1	1	1	0.209512	0.209512
South	Queilen	100.35	58.8	4631.96	Exotic	Crassostrea gigas	3	3	1	0	7	7	4	1.51124	0.863566
South	Queilen	120.5	75.4	7132.27	Exotic	Crassostrea gigas	2	7	0	0	9	9	7	1.26187	0.981454
South	Queilen	109.59	69	5935.94	Exotic	Crassostrea gigas	0	3	0	0	3	3	3	0.505396	0.505396
South	Queilen	126.6	73.3	7284.63	Exotic	Crassostrea gigas	4	0	0	1	5	4	1	0.549102	0.137275
South	Queilen	97.45	63	4819.39	Exotic	Crassostrea gigas	0	4	2	0	6	6	6	1.24497	1.24497
South	Queilen	141.25	71.7	7950.19	Exotic	Crassostrea gigas	0	0	0	8	8	0	8	0	1.00627
South	Queilen	121.6	62.7	5985.09	Exotic	Crassostrea gigas	0	2	0	0	2	2	2	0.334164	0.334164
South	Queilen	146	98.8	11323.5	Exotic	Crassostrea gigas	1	3	0	0	4	4	3	0.353249	0.264937
South	Queilen	143.2	71.4	8026.22	Exotic	Crassostrea gigas	2	3	0	0	5	5	3	0.622959	0.373775
South	Queilen	99.35	59.5	4640.39	Exotic	Crassostrea gigas	1	0	0	2	3	1	2	0.215499	0.430998
South	Queilen	115.4	64.4	5833.93	Exotic	Crassostrea gigas	1	0	0	6	7	1	6	0.171411	1.02847
South	Queilen	115.4	75.4	6830.41	Exotic	Crassostrea gigas	0	0	0	1	1	0	1	0	0.146404
South	Queilen	136.35	71.6	7663.69	Exotic	Crassostrea gigas	1	0	0	1	2	1	1	0.130485	0.130485
South	Rilán	74.4	51.5	3007.81	Exotic	Crassostrea gigas	3	0	0	0	3	3	0	0.997405	0
South	Rilán	60.3	41.5	1964.42	Exotic	Crassostrea gigas	0	0	0	1	1	0	1	0	0.509055
South	Rilán	69.8	40.5	2219.12	Exotic	Crassostrea gigas	0	0	0	1	1	0	1	0	0.45063
South	Rilán	95.4	39.3	2943.14	Exotic	Crassostrea gigas	2	0	0	2	4	2	2	0.679547	0.679547
South	Rilán	85.4	56.1	3760.89	Exotic	Crassostrea gigas	1	0	0	1	2	1	1	0.265895	0.265895
South	Rilán	123.2	52.2	5048.37	Exotic	Crassostrea gigas	0	0	0	1	1	0	1	0	0.198084
South	Isla_Tranqui	102.7	47.6	3837.49	Native	Aulacomya ater	2	0	0	0	2	2	0	0.521174	0
South	Isla_Tranqui	106.6	49.8	4167.31	Native	Aulacomya ater	1	0	0	0	1	1	0	0.239963	0
South	Rilán	74.4	39.9	2330.32	Native	Aulacomya ater	2	0	0	0	2	2	0	0.858251	0
South	Tranqui	35.4	27.9	775.313	Native	Aulacomya ater	0	0	0	1	1	0	1	0	1.2898
South	Isla_Tranqui	40.5	20.5	651.746	Native	Austromegabalanus psittacus	2	0	0	0	2	2	0	3.06868	0
South	Isla_Tranqui	78.3	34.4	2114.41	Native	Austromegabalanus psittacus	0	0	0	1	1	0	1	0	0.472944
South	Queilen	29.8	45.9	1073.74	Native	Austromegabalanus psittacus	29	0	0	0	29	29	0	27.0084	0
South	Queilen	21.5	26.9	454.005	Native	Austromegabalanus psittacus	11	0	0	0	11	11	0	24.2288	0
South	Queilen	32.2	42	1061.63	Native	Austromegabalanus psittacus	0	2	0	0	2	2	2	1.88389	1.88389
South	Queilen	21.6	50.5	856.278	Native	Austromegabalanus psittacus	13	0	0	0	13	13	0	15.182	0
South	Queilen	43.3	38	1291.64	Native	Austromegabalanus psittacus	2	0	0	0	2	2	0	1.54842	0
South	Queilen	31	52	1265.42	Native	Austromegabalanus psittacus	1	0	0	0	1	1	0	0.790251	0
South	Queilen	41	59	1898.91	Native	Austromegabalanus psittacus	3	0	0	0	3	3	0	1.57985	0
South	Rilán	36.6	29.9	859.057	Native	Austromegabalanus psittacus	4	0	0	0	4	4	0	4.65627	0
South	Rilán	33.8	27.3	724.351	Native	Austromegabalanus psittacus	0	0	0	4	4	0	4	0	5.52219
South	Rilán	29.4	27.6	636.98	Native	Austromegabalanus psittacus	0	0	0	1	1	0	1	0	1.56991
South	Rilán	45.1	39.8	1409.06	Native	Austromegabalanus psittacus	0	0	0	1	1	0	1	0	0.709693
South	Rilán	54.4	41	1750.86	Native	Austromegabalanus psittacus	0	1	0	0	1	1	1	0.571147	0.571147
South	Rilán	49.4	42.2	1636.47	Native	Austromegabalanus psittacus	1	0	1	0	2	2	1	1.22214	0.61107
South	Rilán	36.1	32.7	926.669	Native	Austromegabalanus psittacus	7	0	0	0	7	7	0	7.55394	0
South	Rilán	41.6	35.9	1172.35	Native	Austromegabalanus psittacus	0	0	0	3	3	0	3	0	2.55896
South	Rilán	37.3	33.8	989.681	Native	Austromegabalanus psittacus	1	0	0	0	1	1	0	1.01043	0
South	Rilán	25.5	23.7	474.415	Native	Austromegabalanus psittacus	2	0	0	0	2	2	0	4.21572	0
South	Rilán	35.1	20.5	564.847	Native	Austromegabalanus psittacus	0	0	0	4	4	0	4	0	7.08157
South	Rilán	49.6	49.3	1919.54	Native	Austromegabalanus psittacus	1	0	0	0	1	1	0	0.520957	0
South	Rilán	27.3	21.2	454.327	Native	Austromegabalanus psittacus	5	0	0	2	7	5	2	11.0053	4.40212
South	Rilán	27.7	22.7	493.6	Native	Austromegabalanus psittacus	1	0	0	0	1	1	0	2.02593	0
South	Rilán	30.9	25.9	628.243	Native	Austromegabalanus psittacus	1	0	0	0	1	1	0	1.59174	0
South	Rilán	31.5	26.6	657.752	Native	Austromegabalanus psittacus	2	0	0	0	2	2	0	3.04066	0
South	Rilán	37.6	23.3	687.723	Native	Austromegabalanus psittacus	1	0	0	0	1	1	0	1.45407	0
South	Rilán	37.3	28.3	828.638	Native	Austromegabalanus psittacus	1	0	0	0	1	1	0	1.2068	0
South	Rilán	45	42.2	1490.72	Native	Austromegabalanus psittacus	1	0	0	0	1	1	0	0.670819	0
South	Rilán	55.4	34.4	1496.02	Native	Austromegabalanus psittacus	1	0	0	1	2	1	1	0.66844	0.66844
South	Rilán	59.9	32.7	1537.6	Native	Austromegabalanus psittacus	1	0	0	1	2	1	1	0.650363	0.650363
South	Tranqui	26.5	27.5	572.069	Native	Austromegabalanus psittacus	0	0	0	1	1	0	1	0	1.74804
South	Tranqui	25.65	36.4	732.923	Native	Austromegabalanus psittacus	0	0	0	1	1	0	1	0	1.3644
South	Isla_Tranqui	44.4	37.6	1310.51	Native	Crepidula sp	0	0	2	0	2	2	2	1.52612	1.52612
South	Rilán	47.6	39.3	1468.48	Native	Crepidula sp	46	0	63	0	109	109	63	74.2262	42.9014
South	Rilán	48.3	39.8	1509.04	Native	Crepidula sp	12	0	22	0	34	34	22	22.5309	14.5788
South	Rilán	56.1	56.1	2470.56	Native	Crepidula sp	0	0	6	0	6	6	6	2.4286	2.4286
South	Rilán	59.8	54.4	2553.7	Native	Crepidula sp	0	0	3	0	3	3	3	1.17477	1.17477
South	Rilán	60.5	56.6	2688.08	Native	Crepidula sp	5	0	1	0	6	6	1	2.23208	0.372013
South	Rilán	43.7	36.6	1255.54	Native	Crepidula sp	16	0	8	0	24	24	8	19.1152	6.37174
South	Rilán	53.7	43.7	1842.15	Native	Crepidula sp	49	0	16	1	66	65	17	35.2848	9.22834
South	Rilán	58.3	52.7	2411.84	Native	Crepidula sp	0	0	14	11	25	14	25	5.80469	10.3655
South	Rilán	28.3	17.7	393.214	Native	Crepidula sp	0	0	1	0	1	1	1	2.54314	2.54314
South	Rilán	22.6	18.3	324.66	Native	Crepidula sp	0	0	3	0	3	3	3	9.24043	9.24043
South	Rilán	29.8	28.7	671.379	Native	Crepidula sp	1	0	0	0	1	1	0	1.48947	0
South	Rilán	50.5	20.5	812.671	Native	Crepidula sp	11	0	6	0	17	17	6	20.9187	7.38306
South	Rilán	61.5	35.4	1709.02	Native	Fissurella spp	0	0	0	1	1	0	1	0	0.585129
South	Queilen	62.8	32.95	1624.37	Native	Mytilus chilensis	13	0	0	1	14	13	1	8.00311	0.615624
South	Queilen	49.6	28.8333	1122.65	Native	Mytilus chilensis	15	0	0	0	15	15	0	13.3612	0
South	Queilen	26.6	40.5	845.681	Native	Mytilus chilensis	3	0	0	0	3	3	0	3.54744	0
South	Queilen	71.6	35.9	2017.8	Native	Mytilus chilensis	8	1	0	0	9	9	1	4.46031	0.49559
South	Queilen	78	40.5	2479.82	Native	Mytilus chilensis	2	0	0	0	2	2	0	0.806512	0
South	Queilen	47.6	25.4	949.096	Native	Mytilus chilensis	3	0	0	0	3	3	0	3.1609	0
South	Isla_Tranqui	33.8	31.6	838.443	Native	Nacella magellanica	0	0	0	4	4	0	4	0	4.77075
South	Tranqui	27.9	15.75	344.949	Native	Nacella magellanica	0	0	0	2	2	0	2	0	5.79796
South	Isla_Tranqui	79.8	29.4	1841.7	Native	Odontocymbiola sp	1	0	0	1	2	1	1	0.542975	0.542975
South	Isla_Tranqui	23.2	20.6	375.167	Native	Tegula atra	1	0	0	1	2	1	1	2.66548	2.66548
South	Isla_Tranqui	28.6	26.3	590.461	Native	Tegula atra	0	0	0	1	1	0	1	0	1.69359
South	Isla_Tranqui	32.6	28.6	731.903	Native	Tegula atra	0	0	0	1	1	0	1	0	1.3663
South	Isla_Tranqui	32.3	29.7	753.058	Native	Tegula atra	1	0	0	0	1	1	0	1.32792	0
South	Isla_Tranqui	39.9	35.9	1124.44	Native	Tegula atra	2	0	0	24	26	2	24	1.77866	21.3439
South	Isla_Tranqui	40.5	37.7	1198.58	Native	Tegula atra	1	0	0	3	4	1	3	0.834323	2.50297
South	Isla_Tranqui	41.6	39.8	1299.71	Native	Tegula atra	1	0	0	5	6	1	5	0.769403	3.84702
South	Isla_Tranqui	43.3	38.3	1301.84	Native	Tegula atra	1	9	9	4	23	19	22	14.5948	16.8992
South	Rilán	41.5	36.1	1176.05	Native	Tegula atra	0	0	4	0	4	4	4	3.40122	3.40122
South	Tranqui	27.65	25.7	557.825	Native	Tegula atra	0	0	0	12	12	0	12	0	21.5121
South	Tranqui	30.675	28.6	688.684	Native	Tegula atra	5	0	0	1	6	5	1	7.26022	1.45204
South	Tranqui	21.6	19.9	337.424	Native	Tegula atra	0	0	0	0	0	0	0	0	0
South	Tranqui	26.6417	24.7333	517.266	Native	Tegula atra	0	0	0	1	1	0	1	0	1.93324
South	Tranqui	55.6	46.6	2033.9	Native	Tegula atra	0	0	0	8	8	0	8	0	3.93332
South	Tranqui	33.7	31.5	833.317	Native	Tegula atra	0	0	0	3	3	0	3	0	3.60007
South	Queilen	43	24	810.12	Native	Venus antiqua	0	0	0	1	1	0	1	0	1.23439
South	Rilán	47.3	52.7	1956.78	Native	Venus antiqua	2	0	0	0	2	2	0	1.02209	0
South	Rilán	50.5	55.4	2196.19	Native	Venus antiqua	8	0	0	0	8	8	0	3.64266	0
